# Supplementary material for: International Monetary Fund Programs and Tuberculosis Outcomes in Post-Communist Countries
Source: PLOS journal article supplement (doi:10.1371/journal.pmed.0050143), 2008-07-17
Supplement: S7 (10.1371/journal.pmed.0050143.s007) [file journal.pmed.0050143.s007]

**Supporting Information Text S6.** **CEE/FSU Countries not Participating in an IMF Program and Percentage Change in Tuberculosis Mortality Rates (based on Logs), Empirical Sample**

| Table I. CEE/FSU Countries not Participating in an IMF Program and Percentage Change in Tuberculosis Mortality Rates (based on Logs), Empirical Sample | | |
| --- | --- | --- |
| Country | Year | Percentage Change in Tuberculosis Mortality Rates |
| Albania | 1991 | 0.00 |
| Armenia | 1993 | 0.00 |
| Azerbaijan | 1994 | 0.00 |
| Croatia | 2002 | 0.00 |
| Czech Republic | 1992 | 0.00 |
| Czech Republic | 1994 | 0.00 |
| Czech Republic | 1995 | 0.00 |
| Czech Republic | 1996 | 0.00 |
| Czech Republic | 1997 | 0.00 |
| Czech Republic | 1998 | 0.00 |
| Czech Republic | 1999 | 0.00 |
| Czech Republic | 2000 | 0.00 |
| Czech Republic | 2001 | 0.00 |
| Czech Republic | 2002 | -69.31 |
| Estonia | 2002 | -11.78 |
| Georgia | 1993 | 13.35 |
| Hungary | 1998 | 0.00 |
| Hungary | 1999 | -18.23 |
| Hungary | 2000 | 0.00 |
| Hungary | 2001 | -22.31 |
| Hungary | 2002 | 0.00 |
| Poland | 1995 | -13.35 |
| Poland | 1996 | 0.00 |
| Poland | 1997 | -15.42 |
| Poland | 1998 | 0.00 |
| Poland | 1999 | -18.23 |
| Poland | 2000 | 0.00 |
| Poland | 2001 | -22.31 |
| Poland | 2002 | 0.00 |
| Russia | 1991 | -10.54 |
| Slovakia | 2000 | -22.31 |
| Slovakia | 2001 | 0.00 |
| Slovakia | 2002 | 0.00 |
| Slovenia | 1993 | -22.31 |
| Slovenia | 1994 | 0.00 |
| Slovenia | 1995 | 0.00 |
| Slovenia | 1996 | 0.00 |
| Slovenia | 1997 | 0.00 |
| Slovenia | 1998 | 0.00 |
| Slovenia | 1999 | -28.77 |
| Slovenia | 2000 | 0.00 |
| Slovenia | 2001 | 0.00 |
| Slovenia | 2002 | 0.00 |
| Uzbekistan | 1993 | 15.42 |
| Uzbekistan | 1994 | 0.00 |

The geometric average decline was 6.89 percent (arithmetic 5.47 percent). There were only two exceptions to the trend of declining tuberculosis mortality rates when countries were outside of IMF programs: Georgia and Uzbekistan, both in 1993. In both of these countries, tuberculosis rates increased after initiating an IMF program and either dropped or stayed the same after leaving the IMF program.

| Table II. Trends in Tuberculosis Mortality Rates and IMF Participation, Uzbekistan and Georgia | | | |
| --- | --- | --- | --- |
| Country | Year | IMF Participation | Log Tuberculosis Mortality Rates |
| Uzbekistan | 1989 | No | n/a |
| Uzbekistan | 1990 | No | 1.79 |
| Uzbekistan | 1991 | No | 1.79 |
| Uzbekistan | 1992 | No | 1.79 |
| Uzbekistan | 1993 | No | 1.95 |
| Uzbekistan | 1994 | No | 1.95 |
| Uzbekistan | 1995 | Yes | 1.95 |
| Uzbekistan | 1996 | Yes | 2.08 |
| Uzbekistan | 1997 | Yes | 2.20 |
| Uzbekistan | 1998 | Yes | 2.40 |
| Uzbekistan | 1999 | Yes | 2.40 |
| Uzbekistan | 2000 | Yes | 2.48 |
| Uzbekistan | 2001 | Yes | 2.56 |
| Uzbekistan | 2002 | Yes | 2.56 |
| Uzbekistan | 2003 | Yes | 2.64 |
| Uzbekistan | 2004 | No | 2.64 |
| Uzbekistan | 2005 | No | 2.64 |

| Country | Year | IMF Participation | Log Tuberculosis Mortality Rates |
| --- | --- | --- | --- |
| Georgia | 1989 | No | n/a |
| Georgia | 1990 | No | 1.95 |
| Georgia | 1991 | No | 1.95 |
| Georgia | 1992 | No | 1.95 |
| Georgia | 1993 | No | 2.08 |
| Georgia | 1994 | Yes | 2.08 |
| Georgia | 1995 | Yes | 2.30 |
| Georgia | 1996 | Yes | 2.30 |
| Georgia | 1997 | Yes | 2.56 |
| Georgia | 1998 | Yes | 2.48 |
| Georgia | 1999 | Yes | 2.56 |
| Georgia | 2000 | Yes | 2.64 |
| Georgia | 2001 | Yes | 2.64 |
| Georgia | 2002 | Yes | 2.64 |
| Georgia | 2003 | Yes | 2.64 |
| Georgia | 2004 | No | 2.56 |
| Georgia | 2005 | No | 2.40 |
